# Supplementary material
Source: MDPI journal article supplement (https://www.mdpi.com/2073-445X/11/10/1851)
Supplement: s1 [file s1]

**Table S1.** The area of paddy field and dryland under different TPI in China in 1990 and 2020. (unit: km<sup>2</sup>)

| Time | Dryland   |         |        | Paddy field |         |      |
|------|-----------|---------|--------|-------------|---------|------|
|      | <0.4      | 0.4–0.8 | >0.8   | <0.4        | 0.4–0.8 | >0.8 |
| 1990 | 992,721   | 263,854 | 41,352 | 409,152     | 57,526  | 3958 |
| 1995 | 982,509   | 258,103 | 41,794 | 402,420     | 61,961  | 5308 |
| 2000 | 1,011,813 | 268,441 | 44,939 | 405,184     | 61,919  | 5223 |
| 2005 | 1,015,819 | 265,882 | 44,326 | 397,377     | 61,627  | 5202 |
| 2010 | 1,012,319 | 265,053 | 44,080 | 396,801     | 61,437  | 5198 |
| 2015 | 1,011,533 | 264,223 | 43,938 | 397,170     | 60,952  | 5173 |
| 2020 | 995,802   | 277,637 | 46,504 | 388,314     | 63,969  | 5068 |

**Table S2.** Change in the elevations of paddy field and dryland. (unit: km<sup>2</sup>)

| Elevation  | Type        | 1990    | 1995    | 2000    | 2005    | 2010    | 2015    | 2020    |
|------------|-------------|---------|---------|---------|---------|---------|---------|---------|
| 0–200m     | paddy field | 304,594 | 300,143 | 303,161 | 296,348 | 296,442 | 298,099 | 295,482 |
|            | dryland     | 553,835 | 547,394 | 556,627 | 554,462 | 548,880 | 541,016 | 519,806 |
| 200–500m   | paddy field | 83,865  | 85,501  | 84,978  | 84,549  | 84,069  | 83,241  | 84,219  |
|            | dryland     | 242,980 | 244,889 | 258,091 | 259,111 | 259,654 | 260,445 | 266,480 |
| 500–1000m  | paddy field | 41,897  | 43,176  | 42,887  | 42,571  | 42,435  | 42,015  | 40,296  |
|            | dryland     | 166,032 | 164,179 | 169,087 | 171,502 | 171,783 | 174,292 | 184,052 |
| 1000–1500m | paddy field | 20,383  | 21,480  | 21,353  | 21,169  | 21,113  | 20,812  | 19,594  |
|            | dryland     | 187,463 | 182,112 | 190,148 | 191,058 | 191,608 | 194,907 | 198,133 |
| 1500–2500m | paddy field | 12,915  | 12,982  | 13,264  | 13,189  | 13,111  | 12,951  | 11,995  |
|            | dryland     | 120,534 | 117,950 | 123,370 | 122,078 | 121,775 | 121,403 | 121,456 |
| 2500–3500m | paddy field | 272     | 335     | 334     | 334     | 334     | 333     | 316     |
|            | dryland     | 18,679  | 18,654  | 19,438  | 19,223  | 19,197  | 19,122  | 19,128  |
| >3500m     | paddy field | 15      | 14      | 16      | 16      | 16      | 16      | 46      |
|            | dryland     | 4935    | 3824    | 4974    | 4959    | 4952    | 4925    | 7081    |

**Table S3.** Change in the slopes of paddy field and dryland. (unit: km<sup>2</sup>)

| Slope  | Type        | 1990    | 1995    | 2000    | 2005    | 2010    | 2015    | 2020    |
|--------|-------------|---------|---------|---------|---------|---------|---------|---------|
| 0–2°   | paddy field | 328,132 | 322,495 | 325,599 | 318,515 | 318,394 | 319,671 | 309,286 |
|        | dryland     | 811,464 | 802,707 | 822,115 | 827,093 | 824,091 | 823,839 | 811,297 |
| 2–6°   | paddy field | 79,969  | 78,155  | 77,787  | 77,122  | 76,683  | 75,786  | 75,048  |
|        | dryland     | 254,597 | 248,947 | 261,300 | 259,447 | 258,844 | 258,011 | 252,870 |
| 6–15°  | paddy field | 49,579  | 53,060  | 53,148  | 52,843  | 52,662  | 52,235  | 55,899  |
|        | dryland     | 175,719 | 173,645 | 181,095 | 179,440 | 178,786 | 178,295 | 190,745 |
| 15–25° | paddy field | 11,473  | 13,876  | 13,737  | 13,637  | 13,647  | 13,566  | 14,870  |
|        | dryland     | 45,331  | 45,172  | 48,174  | 47,697  | 47,462  | 47,333  | 51,789  |
| >25°   | paddy field | 1540    | 2160    | 2104    | 2097    | 2093    | 2084    | 2284    |
|        | dryland     | 10,902  | 11,982  | 12,553  | 12,396  | 12,314  | 12,260  | 13,316  |

**Table S4.** Change in slope aspects of paddy field and dryland. (unit: km<sup>2</sup>)

| Aspect    | Type        | 1990    | 1995    | 2000    | 2005    | 2010    | 2015    | 2020    |
|-----------|-------------|---------|---------|---------|---------|---------|---------|---------|
| North     | paddy field | 48,706  | 49,591  | 50,582  | 49,635  | 49,586  | 49,641  | 56,259  |
|           | dryland     | 152,839 | 152,597 | 157,503 | 158,028 | 157,706 | 157,912 | 166,982 |
| Northeast | paddy field | 46,657  | 60,840  | 62,114  | 61,075  | 60,885  | 60,951  | 52,098  |
|           | dryland     | 159,812 | 166,679 | 172,884 | 173,313 | 173,017 | 172,988 | 169,391 |
| East      | paddy field | 55,423  | 77,120  | 77,355  | 76,211  | 76,010  | 75,837  | 54,416  |
|           | dryland     | 174,039 | 181,842 | 187,859 | 187,786 | 187,100 | 186,849 | 171,114 |
| Southeast | paddy field | 61,468  | 75,321  | 75,992  | 74,743  | 74,534  | 74,343  | 53,144  |
|           | dryland     | 173,963 | 177,818 | 183,964 | 183,881 | 183,145 | 182,567 | 165,926 |
| South     | paddy field | 63,521  | 62,148  | 62,137  | 61,073  | 60,973  | 60,893  | 52,675  |
|           | dryland     | 167,034 | 163,274 | 167,927 | 168,086 | 167,388 | 167,010 | 160,486 |
| Southwest | paddy field | 65,946  | 51,269  | 50,710  | 49,768  | 49,681  | 49,628  | 57,941  |
|           | dryland     | 158,430 | 148,890 | 154,273 | 154,212 | 153,668 | 153,548 | 157,360 |
| West      | paddy field | 68,311  | 46,930  | 46,481  | 45,612  | 45,583  | 45,621  | 65,458  |
|           | dryland     | 155,783 | 143,618 | 149,110 | 148,943 | 148,269 | 147,952 | 161,994 |
| Northwest | paddy field | 58,567  | 44,398  | 44,753  | 43,932  | 43,965  | 44,088  | 63,021  |
|           | dryland     | 151,027 | 142,470 | 146,548 | 146,556 | 146,008 | 145,734 | 161,696 |

**Table S5.** Land use transformation matrices for paddy field, dryland, and other land among the 32 provinces. (unit: km<sup>2</sup>)

| Province       | Paddy field to Dryland | Dryland to Paddy field | Dryland to Other land | Other land to Dryland | Paddy field to Other land | Other land to Paddy field |
|----------------|------------------------|------------------------|-----------------------|-----------------------|---------------------------|---------------------------|
| Beijing        | 48                     | 0                      | 3556                  | 1206                  | 122                       | 0                         |
| Tianjin        | 563                    | 247                    | 2006                  | 1240                  | 639                       | 124                       |
| Hebei          | 2536                   | 321                    | 31,969                | 24,009                | 1449                      | 355                       |
| Shanxi         | 20                     | 24                     | 27,765                | 24,534                | 25                        | 5                         |
| Inner Mongolia | 116                    | 328                    | 50,701                | 59,622                | 236                       | 727                       |
| Liaoning       | 5819                   | 2418                   | 22,969                | 22,311                | 3755                      | 2520                      |
| Jilin          | 3541                   | 3452                   | 20,527                | 24,892                | 2621                      | 3723                      |
| Heilongjiang   | 4761                   | 19,241                 | 29,562                | 48,406                | 2776                      | 15,318                    |
| Shanghai       | 58                     | 117                    | 175                   | 137                   | 2145                      | 430                       |
| Jiangsu        | 2074                   | 3400                   | 6693                  | 4646                  | 14,135                    | 6496                      |
| Zhejiang       | 818                    | 774                    | 2392                  | 1672                  | 12,377                    | 7691                      |
| Anhui          | 2256                   | 2265                   | 8306                  | 7100                  | 14,348                    | 11,886                    |
| Fujian         | 956                    | 877                    | 5450                  | 4839                  | 11,044                    | 9640                      |
| Jiangxi        | 3094                   | 3017                   | 7395                  | 6909                  | 18,998                    | 18,220                    |
| Shandong       | 832                    | 342                    | 28,764                | 25,608                | 579                       | 305                       |
| Henan          | 2507                   | 5199                   | 25,449                | 19,601                | 1790                      | 1791                      |
| Hubei          | 7816                   | 7635                   | 12,570                | 11,358                | 14,397                    | 12,332                    |
| Hunan          | 3800                   | 3922                   | 10,164                | 9204                  | 23,675                    | 22,117                    |
| Guangdong      | 2058                   | 2031                   | 10,648                | 8703                  | 17,645                    | 14,546                    |
| Guangxi        | 3241                   | 2946                   | 15,130                | 20,685                | 15,248                    | 14,629                    |
| Hainan         | 701                    | 708                    | 3010                  | 2598                  | 1735                      | 1626                      |
| Chongqing      | 4544                   | 4155                   | 11,093                | 10,697                | 3702                      | 3022                      |
| Sichuan        | 15,905                 | 15,310                 | 28,339                | 26,177                | 12,345                    | 9848                      |
| Guizhou        | 2378                   | 2005                   | 22,425                | 22,334                | 9976                      | 8729                      |

|          |      |      |        |        |      |      |
|----------|------|------|--------|--------|------|------|
| Yunnan   | 3231 | 2673 | 34,099 | 33,510 | 9117 | 7782 |
| Tibet    | 12   | 35   | 3628   | 6300   | 156  | 347  |
| Shaanxi  | 1089 | 602  | 32,021 | 27,939 | 4845 | 3898 |
| Gansu    | 91   | 70   | 33,488 | 32,453 | 97   | 86   |
| Qinghai  | 0    | 0    | 4217   | 4729   | 1    | 0    |
| Ningxia  | 142  | 116  | 6281   | 7018   | 1488 | 1764 |
| Xinjiang | 326  | 44   | 13,235 | 46,404 | 108  | 84   |
| Taiwan   | 120  | 125  | 342    | 322    | 2586 | 2371 |

**Table S6.** Landscape indices of paddy field in different elevations.

| Elevation  | Time | NP     | PD     | LPI   | LSI    | AWMSI | AI    | DIVISION | SPLIT  |
|------------|------|--------|--------|-------|--------|-------|-------|----------|--------|
| 0–200m     | 1990 | 25,175 | 0.0827 | 18.15 | 232.71 | 20.04 | 57.93 | 0.9540   | 21.72  |
|            | 2020 | 24,544 | 0.0831 | 20.81 | 230.80 | 21.89 | 57.61 | 0.9510   | 20.41  |
| 200–500m   | 1990 | 24,301 | 0.29   | 2.28  | 195.57 | 4.00  | 32.48 | 0.9976   | 410.14 |
|            | 2020 | 27,459 | 0.33   | 1.79  | 204.88 | 3.44  | 29.43 | 0.9984   | 624.07 |
| 500–1000m  | 1990 | 15,132 | 0.36   | 9.21  | 142.35 | 3.34  | 30.50 | 0.9899   | 99.01  |
|            | 2020 | 16,649 | 0.41   | 7.82  | 147.93 | 3.13  | 26.34 | 0.9925   | 133.11 |
| 1000–1500m | 1990 | 6571   | 0.32   | 16.13 | 92.04  | 3.97  | 35.68 | 0.9721   | 35.81  |
|            | 2020 | 7022   | 0.36   | 18.1  | 92.93  | 3.95  | 33.84 | 0.9659   | 29.33  |
| 1500–2500m | 1990 | 3750   | 0.29   | 2.21  | 73.55  | 2.36  | 35.39 | 0.9965   | 281.90 |
|            | 2020 | 3898   | 0.325  | 1.78  | 73.35  | 2.06  | 33.04 | 0.9974   | 386.89 |
| 2500–3500m | 1990 | 101    | 0.37   | 18.38 | 11.52  | 1.8   | 32.09 | 0.9398   | 16.61  |
|            | 2020 | 151    | 0.48   | 12.66 | 13.06  | 1.44  | 27.18 | 0.9694   | 32.68  |
| >3500m     | 1990 | 1      | 0.07   | 100   | 1.25   | 1.25  | 90.91 | 0        | 1      |
|            | 2020 | 26     | 0.57   | 30.43 | 4.86   | 1.12  | 30.77 | 0.8828   | 8.53   |

**Table S7.** Landscape indices of paddy field in different slopes.

| Slope  | Time | NP     | PD    | LPI   | LSI    | AWMSI | AI    | DIVISIO<br>N | SPLIT     |
|--------|------|--------|-------|-------|--------|-------|-------|--------------|-----------|
| 0–2°   | 1990 | 37,009 | 0.113 | 16.54 | 245.91 | 16.49 | 57.16 | 0.9620       | 26.34     |
|        | 2020 | 34,381 | 0.111 | 16.48 | 239.91 | 15.88 | 56.93 | 0.9677       | 30.99     |
| 2–6°   | 1990 | 49,760 | 0.622 | 0.12  | 248.33 | 1.24  | 12.16 | 1            | 25,087.15 |
|        | 2020 | 46,335 | 0.617 | 0.07  | 240.29 | 1.24  | 12.32 | 1            | 24,934.49 |
| 6–15°  | 1990 | 34,098 | 0.69  | 0.28  | 200.28 | 1.19  | 9.96  | 0.9999       | 16,933.92 |
|        | 2020 | 37,836 | 0.68  | 0.10  | 211.89 | 1.17  | 10.40 | 1            | 22,701.80 |
| 15–25° | 1990 | 9395   | 0.819 | 0.14  | 101.07 | 1.09  | 5.35  | 0.9999       | 7042.41   |
|        | 2020 | 12,124 | 0.815 | 0.10  | 144.75 | 1.07  | 5.91  | 0.9999       | 9318.03   |
| >25°   | 1990 | 1386   | 0.90  | 0.32  | 37.95  | 1.042 | 2.73  | 0.9992       | 1217.45   |
|        | 2020 | 2033   | 0.89  | 0.31  | 45.90  | 1.035 | 3.62  | 0.9994       | 1769.56   |

**Table S8.** Landscape indices of paddy field in different slope aspects.

| Aspect    | Time | NP     | PD    | LPI  | LSI    | AWMSI | AI   | DIVISION | SPLIT     |
|-----------|------|--------|-------|------|--------|-------|------|----------|-----------|
| North     | 1990 | 36,035 | 0.74  | 0.09 | 203.04 | 1.13  | 7.91 | 1        | 24,361.50 |
|           | 2020 | 42,153 | 0.75  | 0.04 | 218.93 | 1.11  | 7.61 | 1        | 30,292.73 |
| Northeast | 1990 | 34,265 | 0.73  | 0.06 | 198.49 | 1.13  | 7.93 | 1        | 23,553.40 |
|           | 2020 | 39,080 | 0.75  | 0.04 | 211.31 | 1.12  | 7.35 | 1        | 27,755.98 |
| East      | 1990 | 39,186 | 0.71  | 0.20 | 213.62 | 1.17  | 9.27 | 1        | 21,025.71 |
|           | 2020 | 39,150 | 0.72  | 0.21 | 212.78 | 1.16  | 8.73 | 1        | 22,318.96 |
| Southeast | 1990 | 43,497 | 0.71  | 0.33 | 226.20 | 1.20  | 8.77 | 0.9999   | 17,989.41 |
|           | 2020 | 38,462 | 0.72  | 0.20 | 211.19 | 1.17  | 8.24 | 1        | 20,048.59 |
| South     | 1990 | 48,288 | 0.73  | 0.09 | 230.69 | 1.14  | 8.33 | 1        | 29,869.03 |
|           | 2020 | 39,657 | 0.75  | 0.16 | 212.55 | 1.13  | 7.23 | 1        | 25,364.57 |
| Southwest | 1990 | 47,798 | 0.72  | 0.05 | 236.13 | 1.14  | 8.01 | 1        | 32,359.14 |
|           | 2020 | 42,737 | 0.74  | 0.04 | 222.10 | 1.13  | 7.65 | 1        | 29,424.76 |
| West      | 1990 | 48,768 | 0.71  | 0.04 | 237.20 | 1.14  | 9.23 | 1        | 32,036.42 |
|           | 2020 | 46,987 | 0.72  | 0.05 | 232.38 | 1.13  | 9.15 | 1        | 31,149.13 |
| Northwest | 1990 | 42,703 | 0.729 | 0.04 | 222.52 | 1.14  | 7.90 | 1        | 29,238.32 |
|           | 2020 | 45,736 | 0.726 | 0.05 | 229.73 | 1.13  | 8.36 | 1        | 31,317.93 |

**Table S9.** Landscape indices of dryland in different elevations.

| Elevation  | Time | NP     | PD    | LPI   | LSI    | AWMSI | AI     | DIVISION | SPLIT  |
|------------|------|--------|-------|-------|--------|-------|--------|----------|--------|
| 0–200m     | 1990 | 27,144 | 0.049 | 50.47 | 226.34 | 58.39 | 69.67  | 0.7396   | 3.84   |
|            | 2020 | 26546  | 0.051 | 50.88 | 229.60 | 65.69 | 68.25  | 0.7304   | 3.71   |
| 200–500m   | 1990 | 28,945 | 0.119 | 14.77 | 224.48 | 20.60 | 54.56  | 0.9650   | 28.57  |
|            | 2020 | 31,390 | 0.118 | 14.20 | 231.22 | 23.40 | 55.29  | 0.9549   | 22.19  |
| 500–1000m  | 1990 | 30,399 | 0.183 | 2.87  | 216.35 | 6.41  | 47.016 | 0.9942   | 171.26 |
|            | 2020 | 33,425 | 0.182 | 2.88  | 224.38 | 6.70  | 47.75  | 0.9943   | 175.17 |
| 1000–1500m | 1990 | 28,418 | 0.152 | 8.08  | 231.99 | 12.92 | 46.52  | 0.9856   | 69.22  |
|            | 2020 | 30,267 | 0.153 | 6.98  | 231.32 | 10.16 | 48.10  | 0.9891   | 91.36  |
| 1500–2500m | 1990 | 21,794 | 0.18  | 10.97 | 203.79 | 10.81 | 41.37  | 0.9842   | 63.13  |
|            | 2020 | 22,771 | 0.19  | 8.66  | 205.48 | 9.41  | 41.08  | 0.9880   | 83.26  |
| 2500–3500m | 1990 | 5087   | 0.27  | 3.96  | 84.88  | 2.79  | 38.02  | 0.9948   | 191.51 |
|            | 2020 | 5029   | 0.26  | 2.90  | 84.39  | 2.54  | 39.18  | 0.9958   | 237.34 |
| >3500m     | 1990 | 1819   | 0.37  | 11.55 | 47.85  | 2.39  | 32.10  | 0.9828   | 58.30  |
|            | 2020 | 2213   | 0.31  | 4.52  | 55.50  | 2.16  | 34.18  | 0.9944   | 177.09 |

**Table S10.** Landscape indices of dryland in different slopes.

| Slope  | Time | NP     | PD     | LPI   | LSI    | AWMSI | AI    | DIVISION | SPLIT     |
|--------|------|--------|--------|-------|--------|-------|-------|----------|-----------|
| 0–2°   | 1990 | 66,655 | 0.082  | 33.36 | 319.45 | 42.63 | 64.60 | 0.8833   | 8.57      |
|        | 2020 | 65,618 | 0.081  | 30.90 | 324.21 | 47.76 | 64.07 | 0.8918   | 9.24      |
| 2–6°   | 1990 | 98,622 | 0.3874 | 0.67  | 386.46 | 2.38  | 23.39 | 0.9998   | 5445.66   |
|        | 2020 | 97,839 | 0.3869 | 0.63  | 384.19 | 2.26  | 23.63 | 0.9998   | 6413.97   |
| 6–15°  | 1990 | 85,007 | 0.48   | 0.67  | 343.96 | 1.84  | 17.93 | 0.9999   | 8040.86   |
|        | 2020 | 90,363 | 0.47   | 1.33  | 355.44 | 2.02  | 18.61 | 0.9997   | 3857.67   |
| 15–25° | 1990 | 31,247 | 0.69   | 0.08  | 191.99 | 1.18  | 9.83  | 0.9999   | 18,383.59 |
|        | 2020 | 35,149 | 0.68   | 0.16  | 203.55 | 1.21  | 10.43 | 0.9999   | 16,923.59 |
| >25°   | 1990 | 8354   | 0.77   | 0.20  | 96.56  | 1.11  | 7.51  | 0.9998   | 5697.68   |
|        | 2020 | 10,129 | 0.76   | 0.22  | 106.40 | 1.12  | 7.78  | 0.9999   | 6742.05   |

**Table S11.** Landscape indices of dryland in different slope aspects.

| Aspect    | Time | NP      | PD    | LPI  | LSI    | AWMSI | AI    | DIVISION | SPLIT     |
|-----------|------|---------|-------|------|--------|-------|-------|----------|-----------|
| North     | 1990 | 97,142  | 0.64  | 0.47 | 343.43 | 1.34  | 12.43 | 0.9999   | 16,673.19 |
|           | 2020 | 104,938 | 0.63  | 0.70 | 355.38 | 1.43  | 12.99 | 0.9999   | 10,220.74 |
| Northeast | 1990 | 101,700 | 0.636 | 0.15 | 351.64 | 1.28  | 12.02 | 1        | 32,028.46 |
|           | 2020 | 107,189 | 0.633 | 0.12 | 360.43 | 1.30  | 12.36 | 1        | 31,316.13 |
| East      | 1990 | 109,638 | 0.63  | 0.07 | 366.34 | 1.242 | 12.15 | 1        | 49,897.41 |
|           | 2020 | 109,461 | 0.64  | 0.08 | 364.85 | 1.237 | 11.75 | 1        | 50,233.15 |
| Southeast | 1990 | 109,655 | 0.63  | 0.22 | 365.95 | 1.283 | 12.20 | 1        | 35,557.87 |
|           | 2020 | 105,587 | 0.64  | 0.20 | 358.78 | 1.279 | 11.92 | 1        | 34,698.91 |
| South     | 1990 | 107,203 | 0.64  | 0.38 | 360.17 | 1.29  | 11.84 | 1        | 25,571.70 |
|           | 2020 | 104,166 | 0.65  | 0.32 | 353.96 | 1.28  | 11.59 | 1        | 27,587.57 |
| Southwest | 1990 | 104,549 | 0.660 | 0.43 | 354.27 | 1.25  | 10.92 | 1        | 24,822.70 |
|           | 2020 | 104,352 | 0.663 | 0.46 | 353.03 | 1.27  | 10.96 | 1        | 21,374.37 |
| West      | 1990 | 102,949 | 0.661 | 0.06 | 350.63 | 1.21  | 11.12 | 1        | 51,126.23 |
|           | 2020 | 107,562 | 0.664 | 0.07 | 358.65 | 1.20  | 10.91 | 1        | 54,757.88 |
| Northwest | 1990 | 97,985  | 0.649 | 0.11 | 344.39 | 1.25  | 11.32 | 1        | 39,541.63 |
|           | 2020 | 105,544 | 0.653 | 0.08 | 356.6  | 1.246 | 11.26 | 1        | 43,009.13 |
